# Supplementary material for: Factors Associated With the People Preferences for the Breast Cancer Genetic Tests: a Systematic Review
Source: Research Square preprint supplement (doi:10.21203/rs.3.rs-231482/v1), 2021-02-23
Supplement: Supplementary file 1 [file 41435a87d3fd8f1f83e06c03.docx]

| **Symmetric Measures** | | | | | |
| --- | --- | --- | --- | --- | --- |
|  | | Value | Asymp. Std. Errora | Approx. Tb | Approx. Sig. |
| Measure of Agreement | Kappa | .721 | .043 | 19.839 | .000 |
| N of Valid Cases | | 721 |  |  |  |
| a. Not assuming the null hypothesis. | | | | | |
| b. Using the asymptotic standard error assuming the null hypothesis. | | | | | |
|  |  |  |  |  |  |
| **DIFFER** | | | | | |
|  | | Frequency | Percent | Valid Percent | Cumulative Percent |
| Valid | -1.00 | 4 | .6 | .6 | .6 |
| .00 | 684 | 94.9 | 94.9 | 95.4 |
| 1.00 | 33 | 4.6 | 4.6 | 100.0 |
| Total | 721 | 100.0 | 100.0 |  |
